# Supplementary material for: Discovery of fluorescent 3-heteroarylcoumarin derivatives as novel inhibitors of anaplastic lymphoma kinase
Source: Royal Society of Chemistry journal article supplement (doi:10.1039/c8ob02874e), 2018-12-06

## ***Supporting Information***

# **Discovery of fluorescent 3-heteroarylcoumarin derivatives as novel inhibitors of anaplastic lymphoma kinase**

*Shinmee Mah, Jaebong Jang, Daesun Song, Yoongje Shin, Muhammad Latif, Yongwon Jung\* and Sungwoo Hong\**

*Department of Chemistry, Korea Advance Institute of Science and Technology (KAIST), Daejeon 34141, Korea  
Center for Catalytic Hydrocarbon Functionalizations, Institute of Basic Science (IBS), Daejeon 34141, Korea*

**Enzymatic assay.**

The biochemical potencies of the inhibitors were measured with the radiometric kinase assays ([ $\gamma$ - $^{33}\text{P}$ ]-ATP) at Reaction Biology Corp. (Malvern, PA, USA) using staurosporine as the positive control, which represented the ATP-competitive inhibitors with low-nanomolar activity. Briefly, the enzymatic reaction mixtures contain Human ALK, an artificial peptide substrate, poly[Glu:Tyr] (4:1), in freshly prepared base reaction buffer (20 mM HEPES of pH 7.5, 10 mM  $\text{MgCl}_2$ , 1 mM EGTA, 0.02% Brij-35, 0.02 mg/ml BSA, 0.1 mM  $\text{Na}_3\text{VO}_4$ , 2 mM DTT, 1% DMSO). Compounds were delivered into the substrate solution and gently mixed. Each putative inhibitor in 100% DMSO with the indicated concentrations was then delivered to the reaction buffer using the acoustic dispensing system (Echo550; nanoliter range). To initiate the enzymatic reaction,  $^{33}\text{P}$ -ATP with a specific activity of 10  $\mu\text{Ci}/\mu\text{L}$  was added to the reaction mixture, which was followed by further incubation of the mixture for 2 h at room temperature. Radioactivity was then monitored by the filter-binding method after reactions were spotted onto P81 ion exchange paper and the filters were washed extensively in 0.75% phosphoric acid. Aurora kinase activity data were expressed as the percent remaining activity in test samples compared to the vehicle (dimethyl sulfoxide) reaction. Finally,  $\text{IC}_{50}$  values were calculated based on curve fitting using the PRISM program (GraphPad Software) at 10 different concentrations.

**Cell growth assay.** Ba/F3 EML4-ALK WT (EA WT) were plated at a density of 4,000 cells/well in 96 well plates and incubated for 24 h. The medium was then removed, and cells were treated with different concentrations of compounds for 72 h. Next, 20  $\mu\text{L}$  of MTT solution (2 mg/mL) was added for 4 h at 37 °C in 5%  $\text{CO}_2$  incubator. After the media was then removed, 200  $\mu\text{L}$  of DMSO was added to each well, and the plate was incubated for an additional 4 h at 37°C. The formazan crystals that formed in metabolically healthy cells were dissolved in DMSO (200  $\mu\text{L}$ /well) with constant shaking for 30 min. Absorbance of the solution was then measured with a microplate reader at 540 nm.

**Spectral Copies of  $^1\text{H}$  and  $^{13}\text{C}$  NMR Data**  
**Obtained in this study**

### 3-(1,3-Benzothiazol-2-yl)-7-(diethylamino)chromen-2-one (3h)

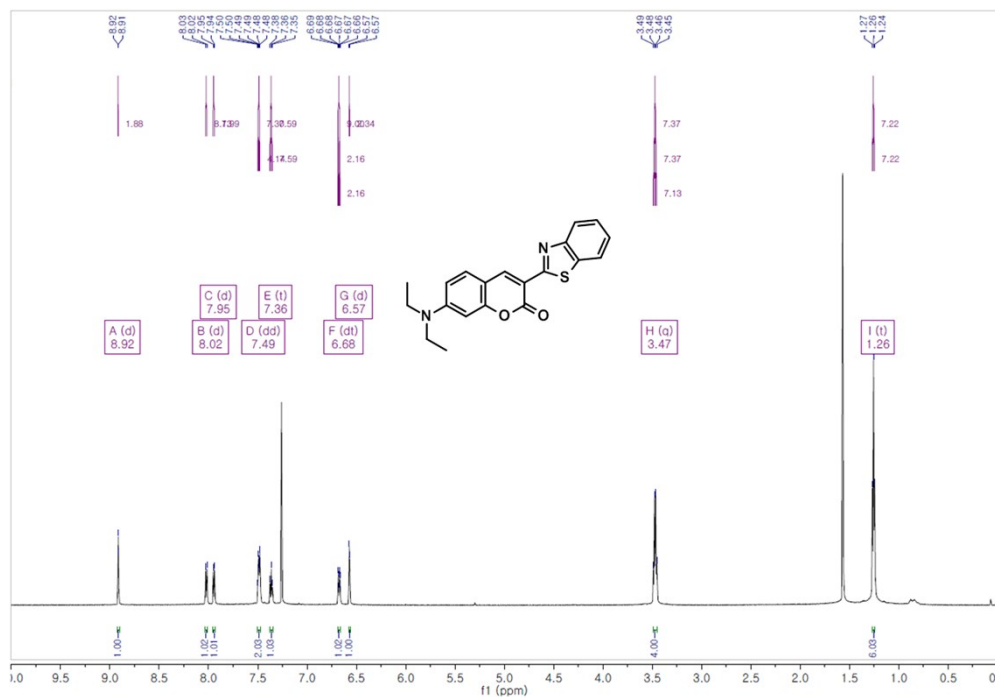

**600 MHz,  $^1\text{H}$  NMR in  $\text{CDCl}_3$ .**

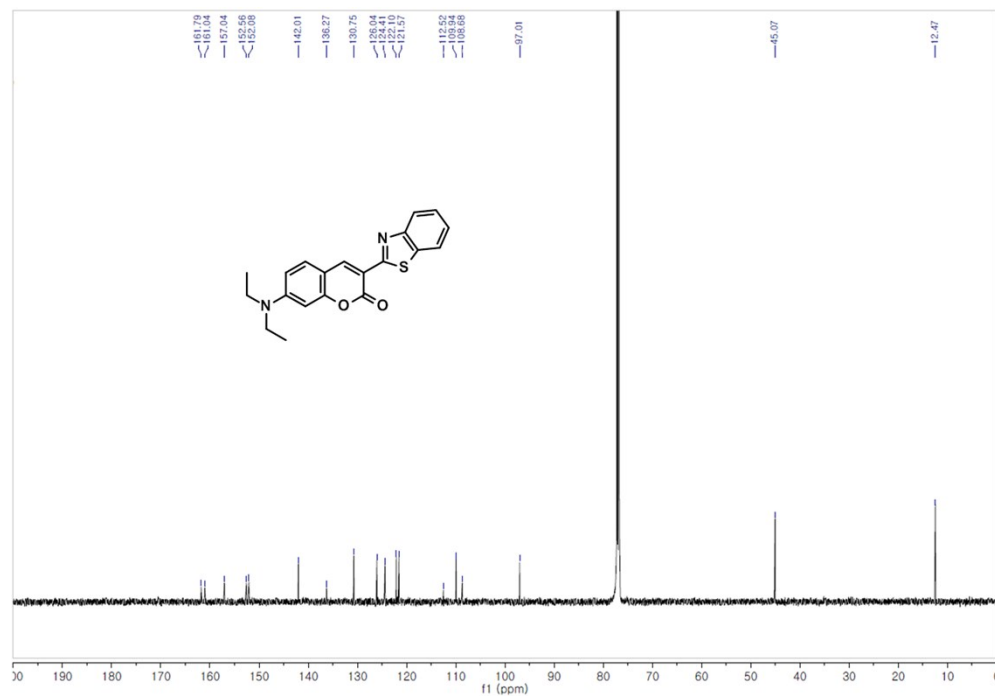

**150 MHz, <sup>13</sup>C NMR in CDCl<sub>3</sub>.**

**3-(1,3-Benzoxazol-2-yl)-7-(diethylamino)chromen-2-one (4a)**

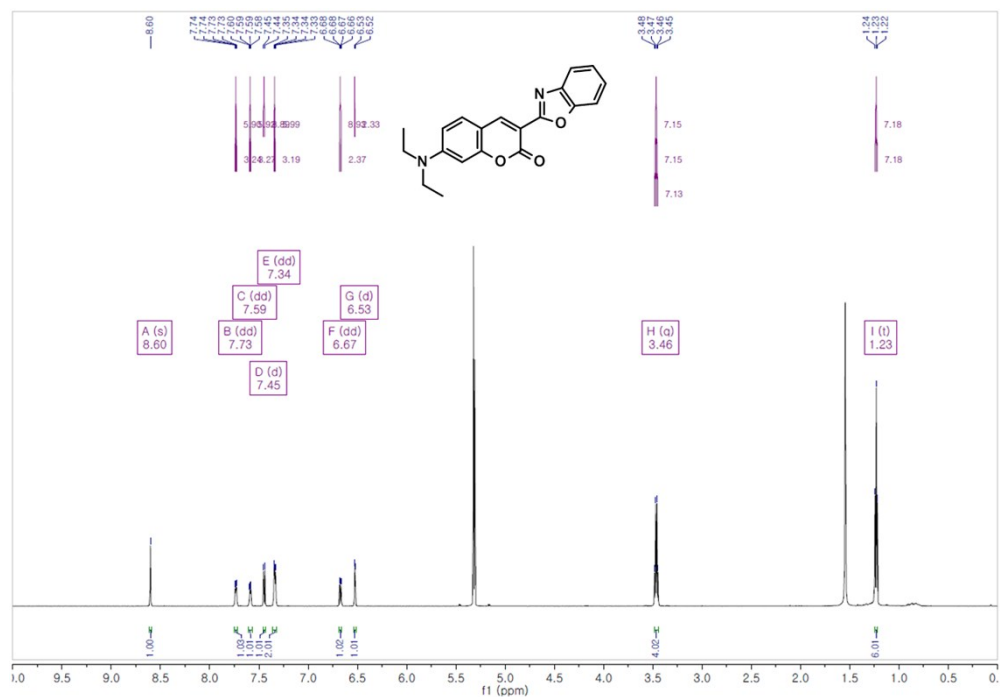

**600 MHz, <sup>1</sup>H NMR in CD<sub>2</sub>Cl<sub>2</sub>.**

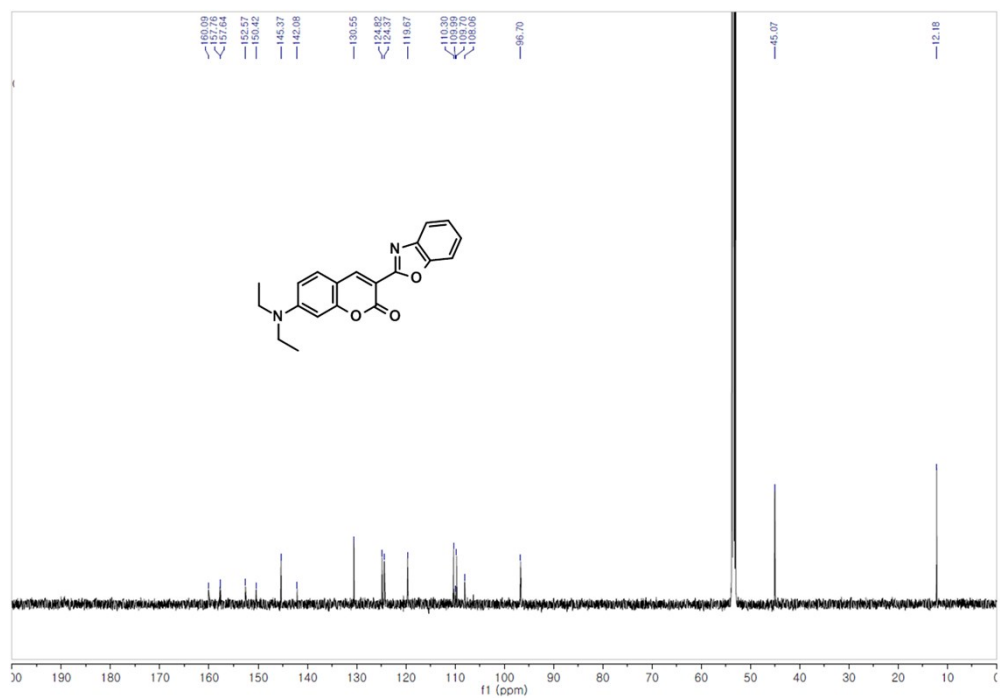

**150 MHz, <sup>13</sup>C NMR in CD<sub>2</sub>Cl<sub>2</sub>.**

**7-(Diethylamino)-3-(6-phenyl-1,3-benzothiazol-2-yl)chromen-2-one (4b)**

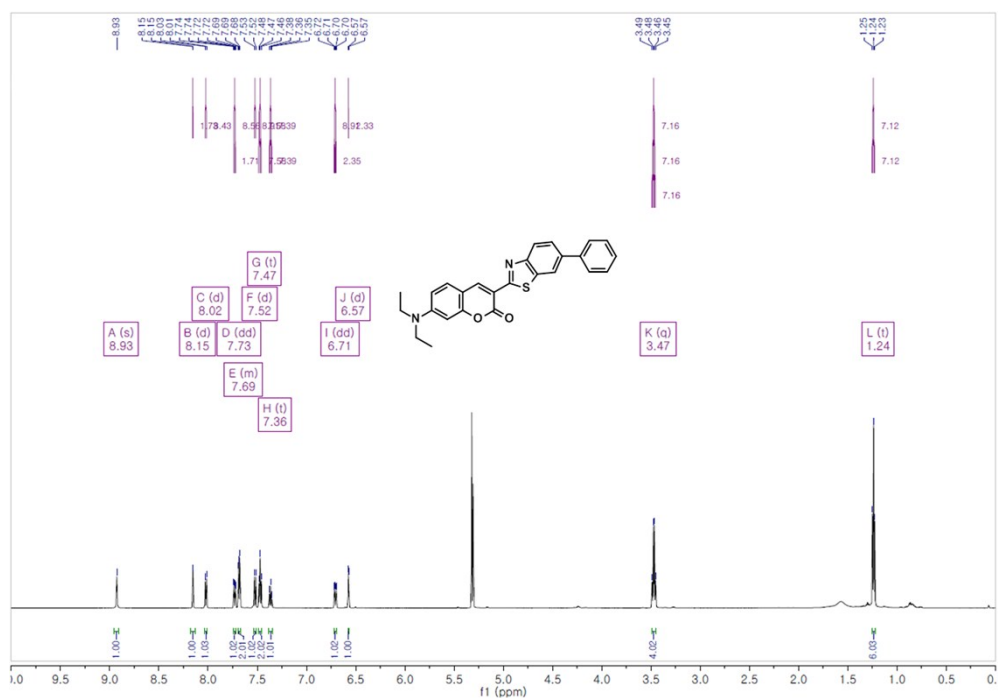

**600 MHz,  $^1\text{H}$  NMR in  $\text{CD}_2\text{Cl}_2$ .**

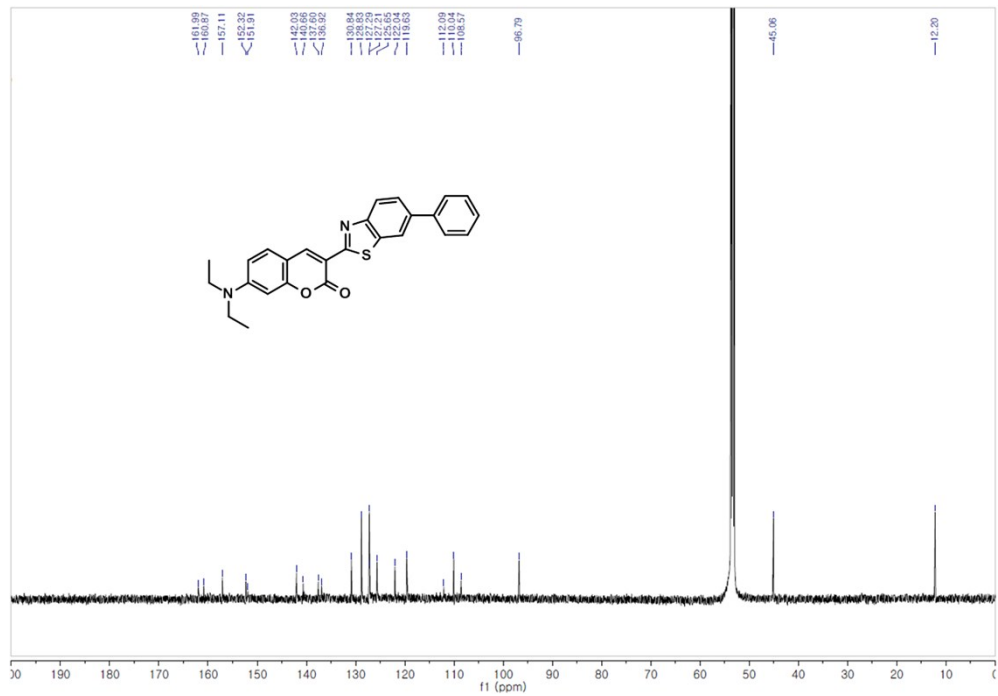

**150 MHz,  $^{13}\text{C}$  NMR in  $\text{CD}_2\text{Cl}_2$ .**

**8-[7-(Diethylamino)-2-oxo-chromen-3-yl]-1,3,7-trimethyl-purine-2,6-dione (4c)**

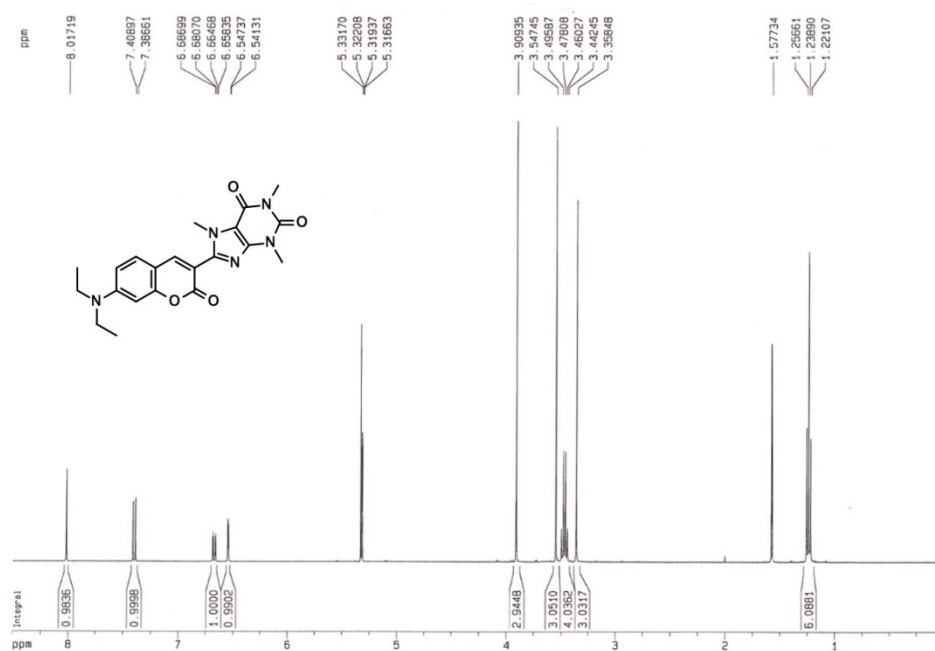

**400 MHz, <sup>1</sup>H NMR in CD<sub>2</sub>Cl<sub>2</sub>.**

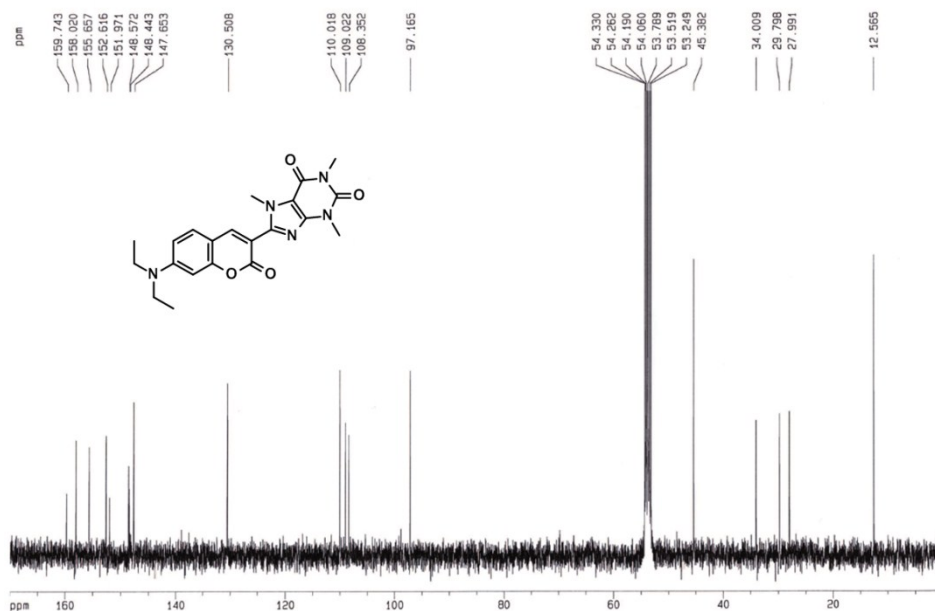

**100 MHz, <sup>13</sup>C NMR in CD<sub>2</sub>Cl<sub>2</sub>.**

**7-(Diethylamino)-3-(6-methoxybenzo[d]thiazol-2-yl)-2H-chromen-2-one (4d)**

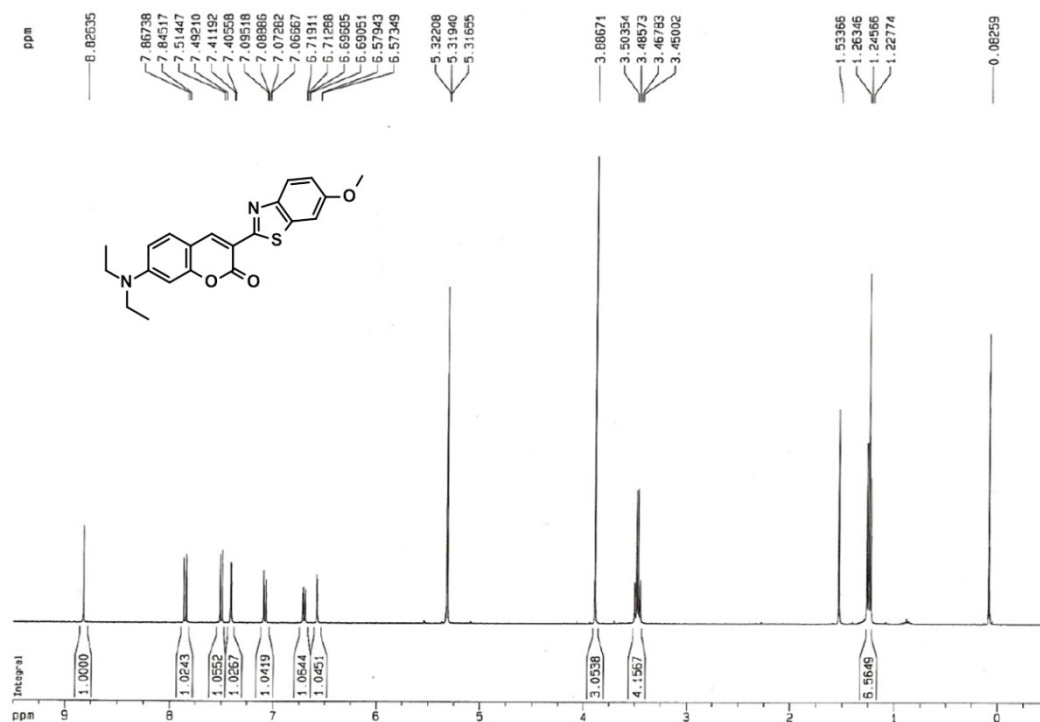

400 MHz, <sup>1</sup>H NMR in CD<sub>2</sub>Cl<sub>2</sub>.

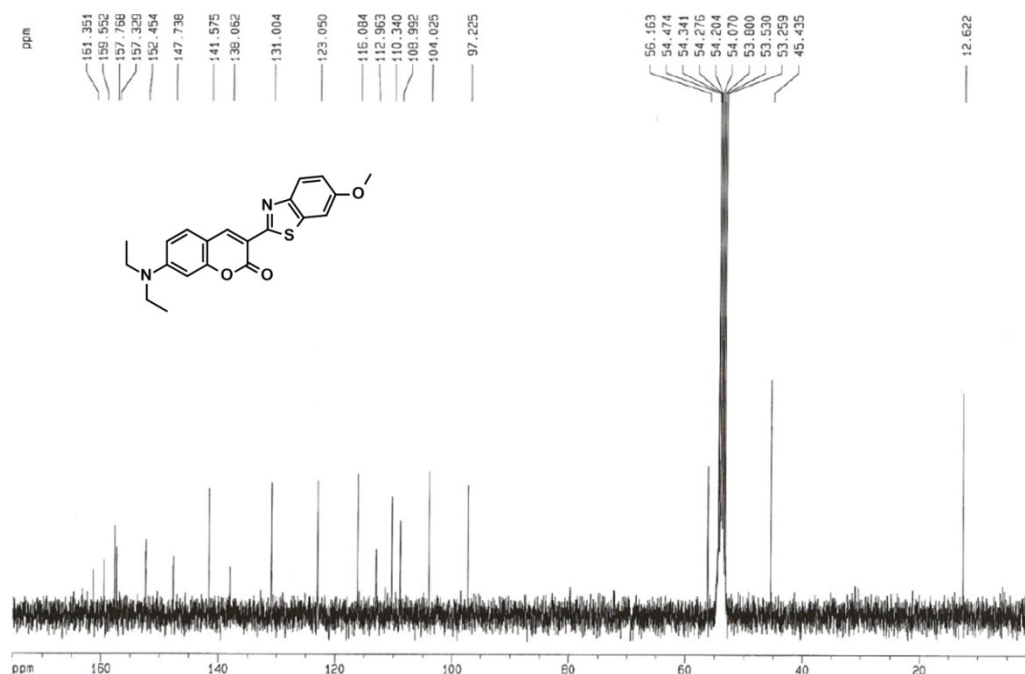

100 MHz, <sup>13</sup>C NMR in CD<sub>2</sub>Cl<sub>2</sub>.



### 3-(6-Methoxy-1,3-benzothiazol-2-yl)-7-morpholino-chromen-2-one (5a)

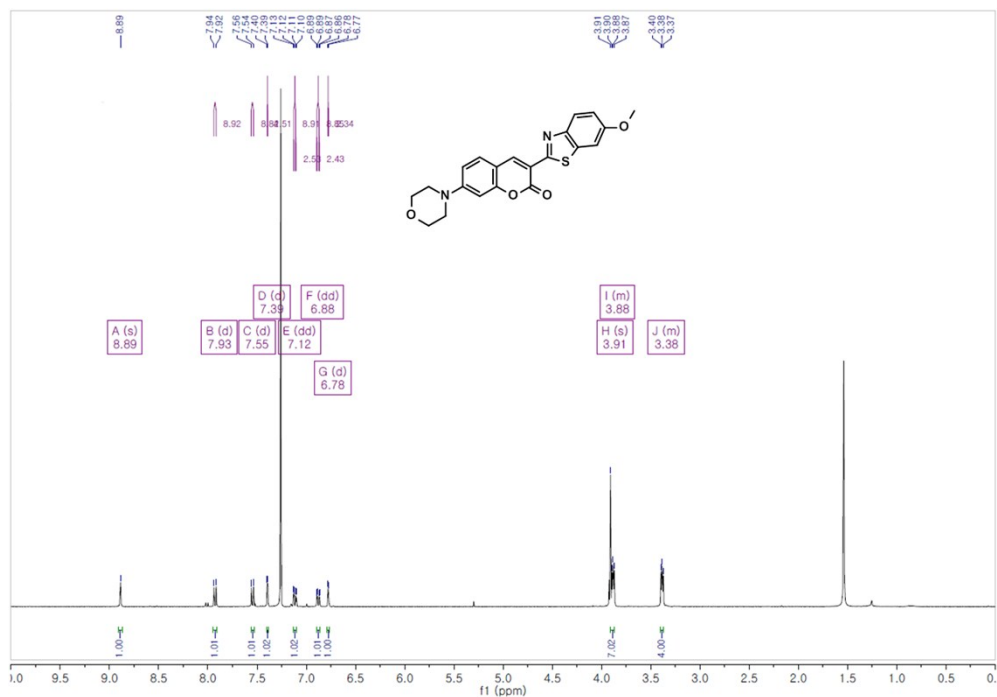

400 MHz, <sup>1</sup>H NMR in CDCl<sub>3</sub>.

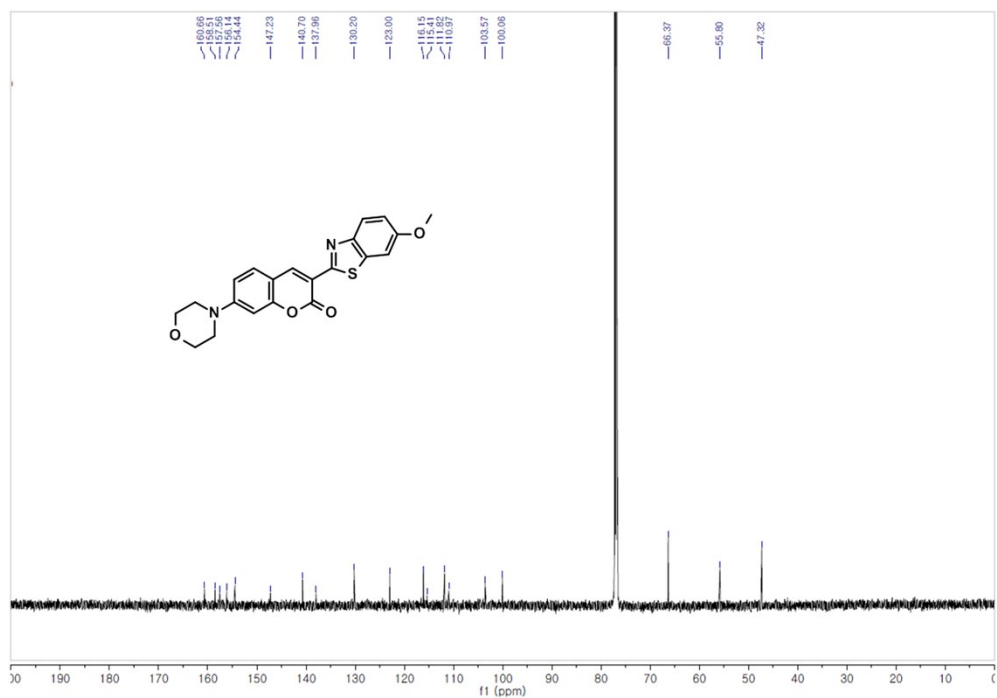

150 MHz, <sup>13</sup>C NMR in CDCl<sub>3</sub>.

**3-(6-Methoxy-1,3-benzothiazol-2-yl)-7-(4-methylpiperazin-1-yl)chromen-2-one (5b)**

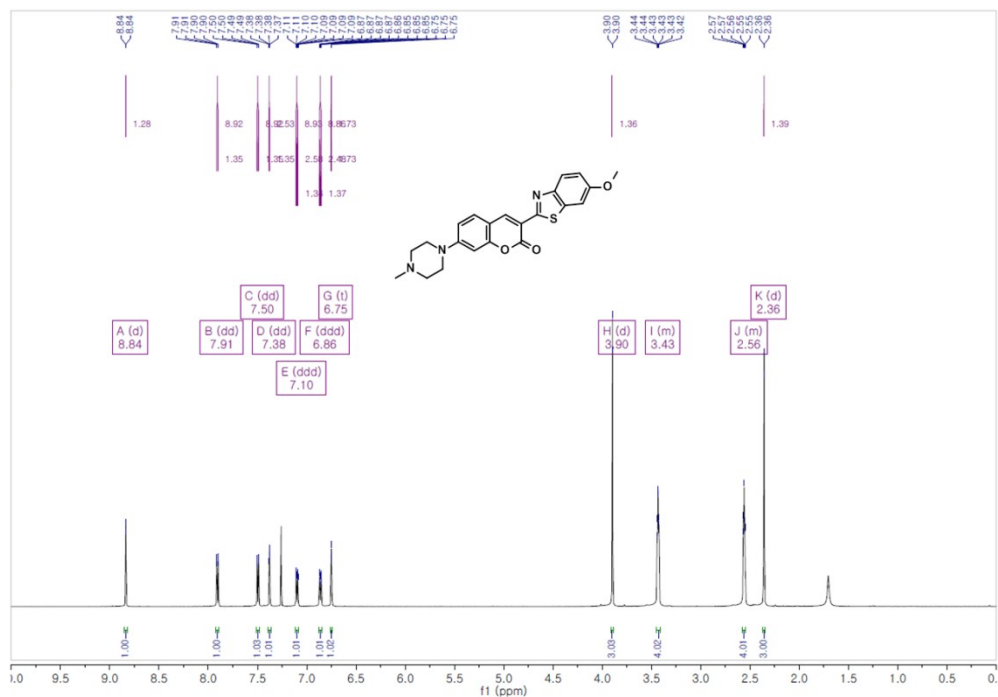

**600 MHz, <sup>1</sup>H NMR in CDCl<sub>3</sub>.**

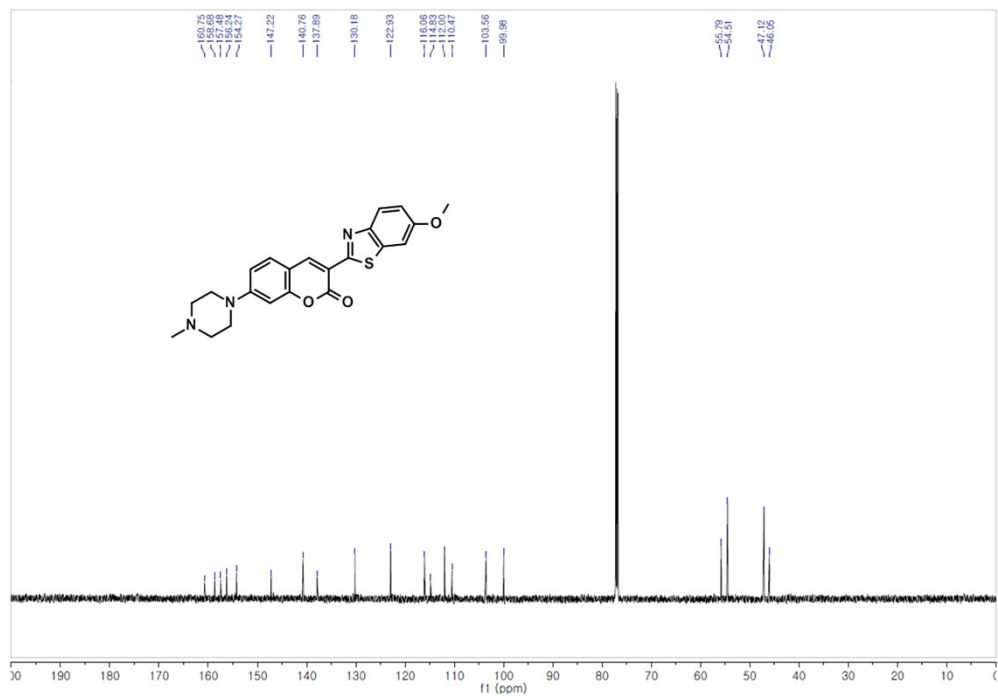

**150 MHz, <sup>13</sup>C NMR in CDCl<sub>3</sub>.**

***tert*-Butyl 4-[3-(6-methoxy-1,3-benzothiazol-2-yl)-2-oxo-chromen-7-yl]piperazine-1-carboxylate (5c)**

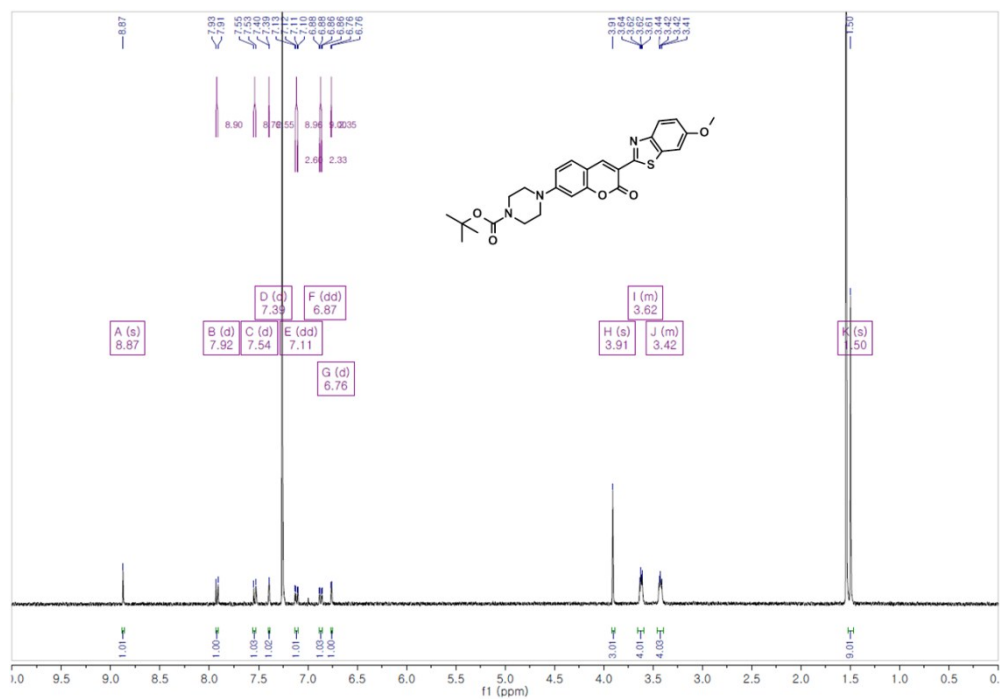

400 MHz, <sup>1</sup>H NMR in CDCl<sub>3</sub>.

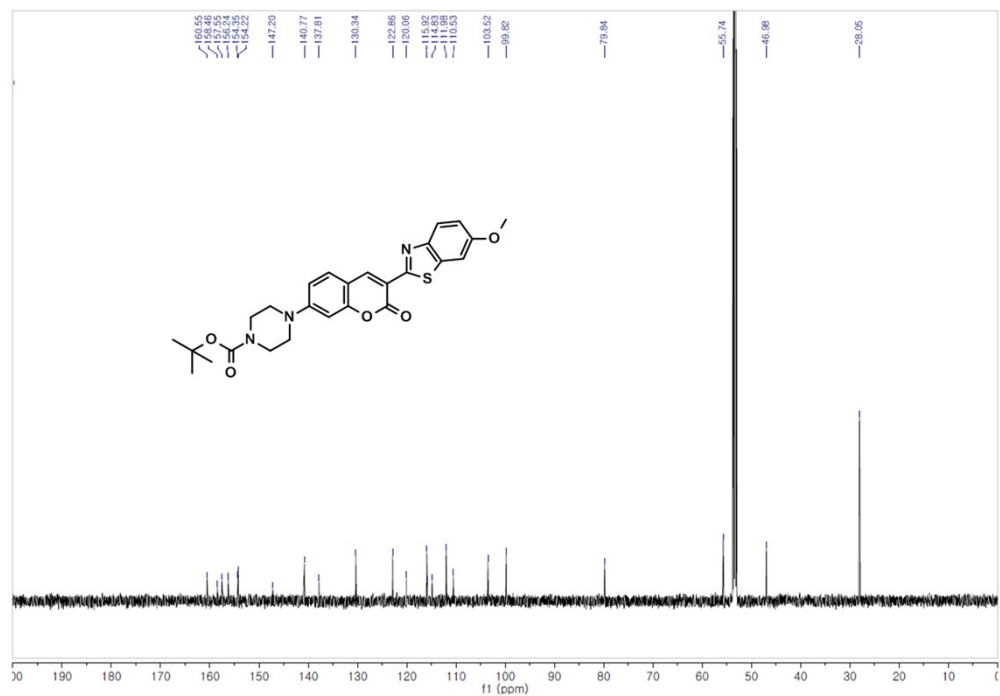

150 MHz, <sup>13</sup>C NMR in CD<sub>2</sub>Cl<sub>2</sub>.

**7-Methoxy-3-(6-methoxy-1,3-benzothiazol-2-yl)chromen-2-one (6a)**

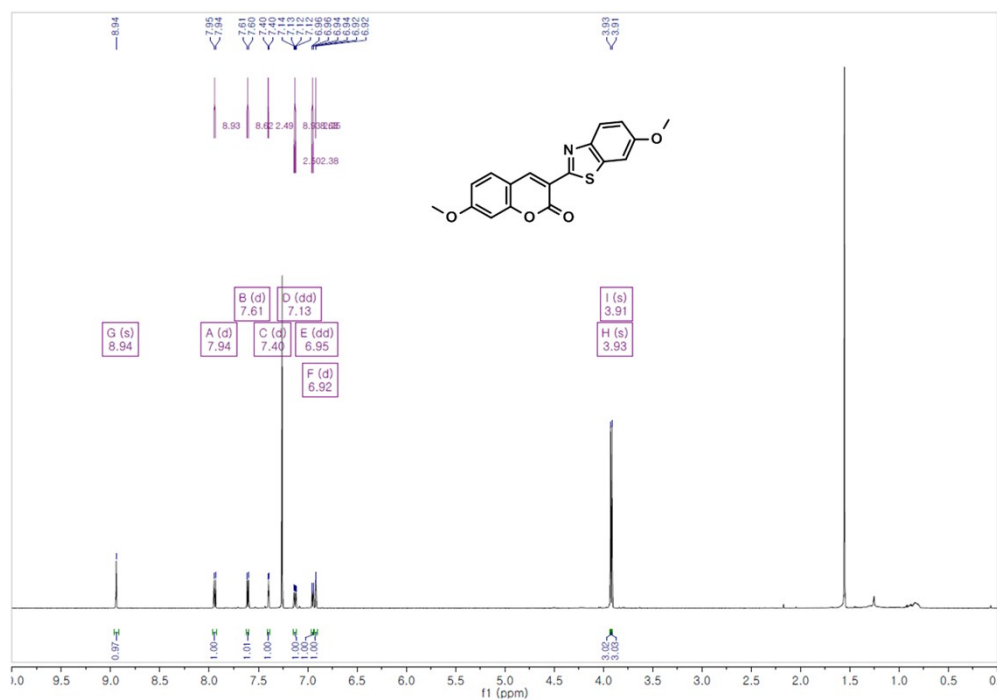

**600 Mhz, <sup>1</sup>H NMR in CDCl<sub>3</sub>.**

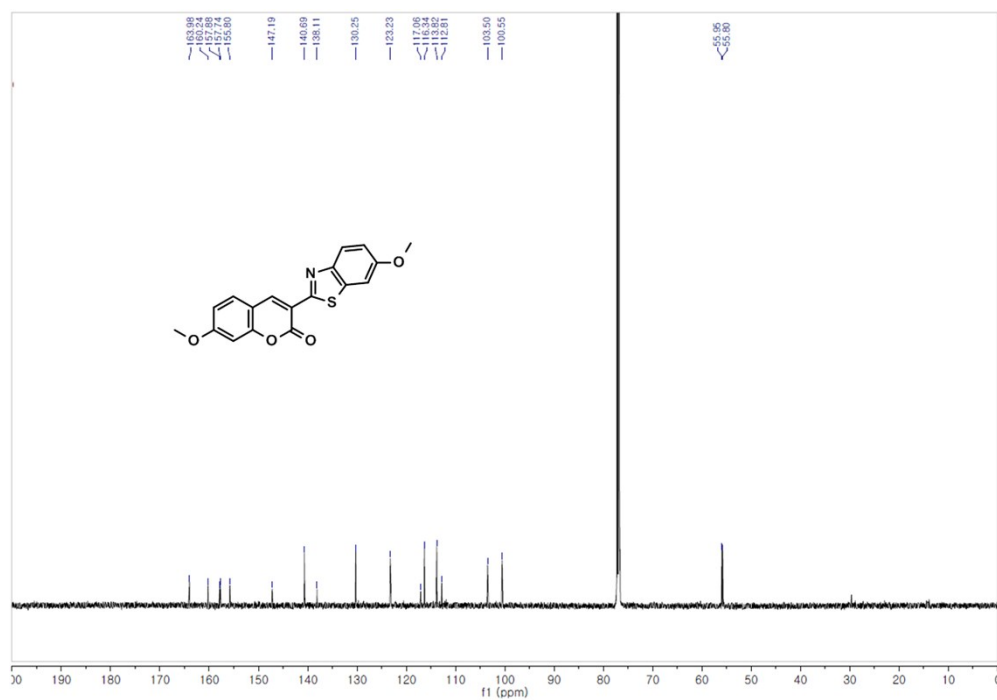

**150 MHz, <sup>13</sup>C NMR in CDCl<sub>3</sub>.**

**3-(Benzo[d]thiazol-2-yl)-7-methoxy-2H-chromen-2-one (6b)**

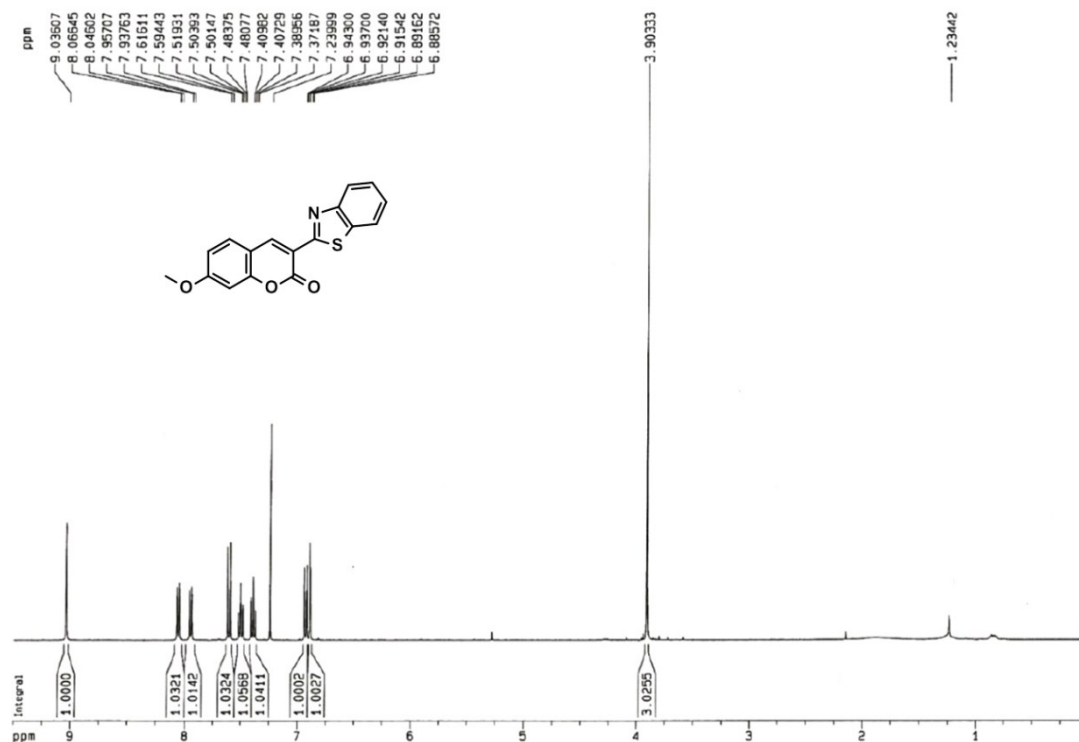

400 Mhz, <sup>1</sup>H NMR in CDCl<sub>3</sub>.

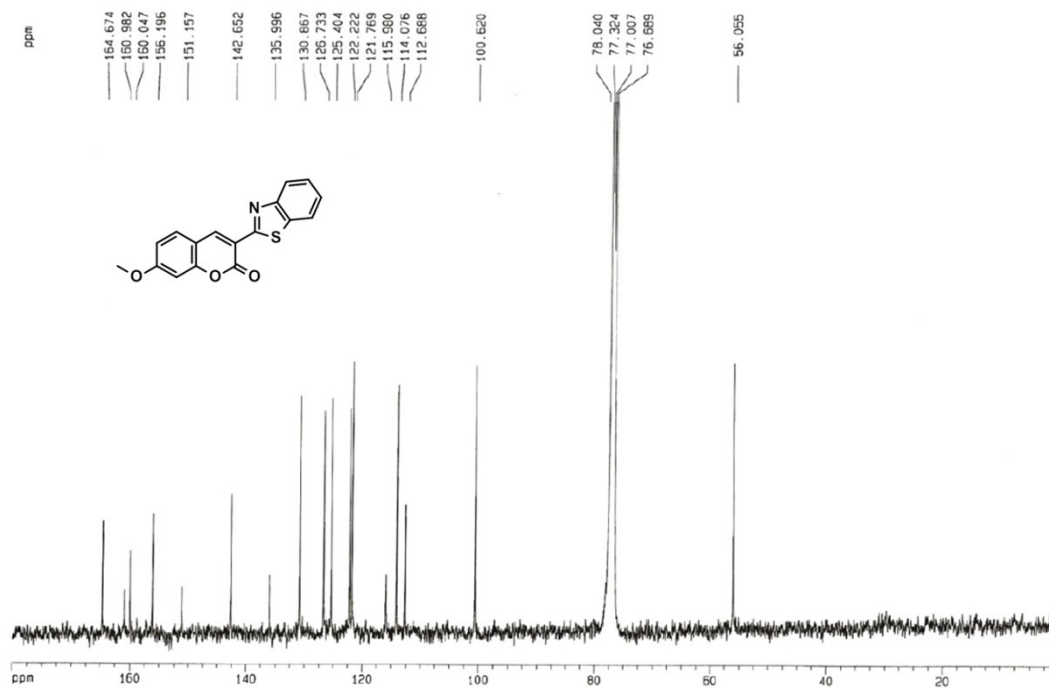

100 MHz, <sup>13</sup>C NMR in CDCl<sub>3</sub>.

# **7-Methoxy-3-[5-(2-methoxyphenyl)thiazol-2-yl]chromen-2-one (6c)**

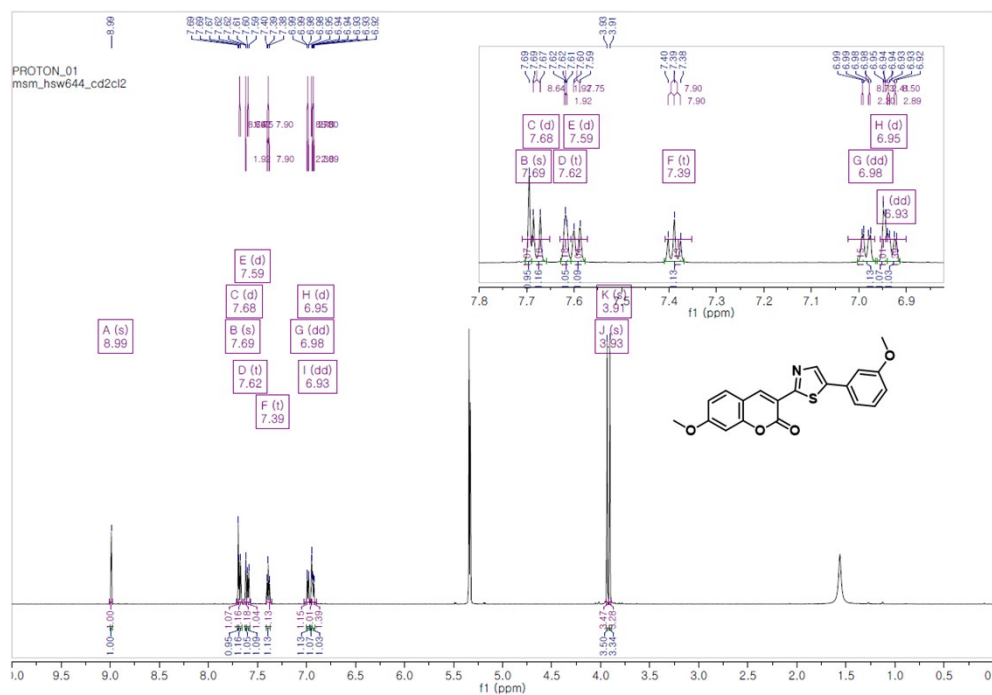

**600 Mhz,  $^1\text{H}$  NMR in  $\text{CDCl}_3$ .**

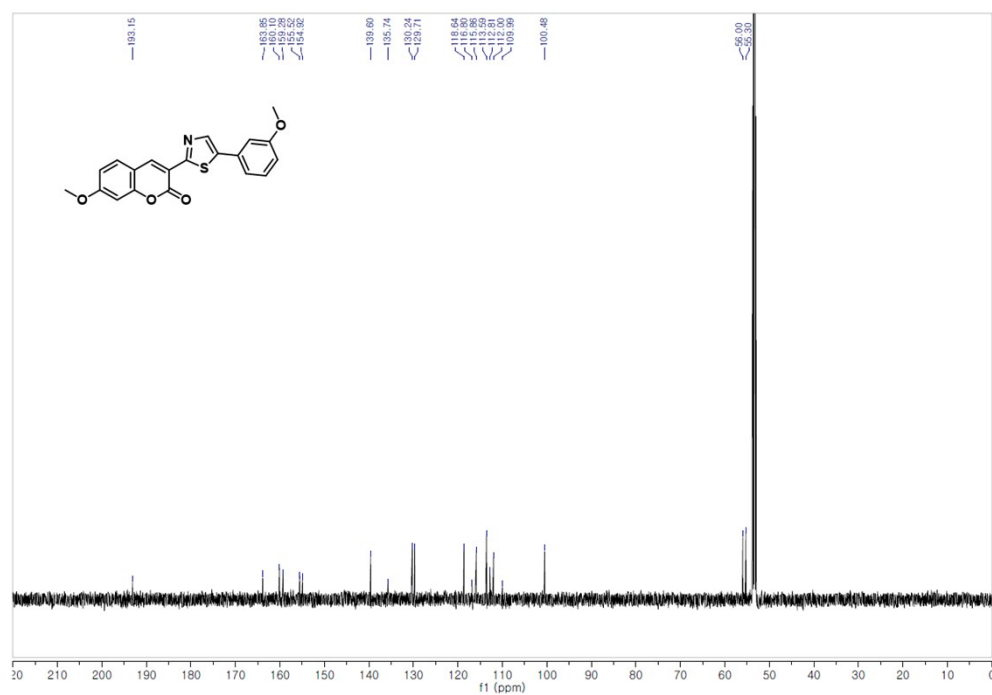

Supplement: c8ob02874e1.pdf [file c8ob02874e1.pdf]
